# Supplementary material for: A peptidic inhibitor for PD-1 palmitoylation targets its expression and functions
Source: PubMed Central journal article supplement — RSC Chem Biol. 2020 Nov 3;2(1):192–205. doi: 10.1039/d0cb00157k (PMC8341464; doi:10.1039/d0cb00157k), 2020-11-03
Supplement: CB-002-D0CB00157K-s001.pdf [file CB-002-D0CB00157K-s001.pdf]

## SUPPLEMENTARY INFORMATION

**Fig.S1. Click-IT assay of the palmitoylation level of PD-1.**

**A**

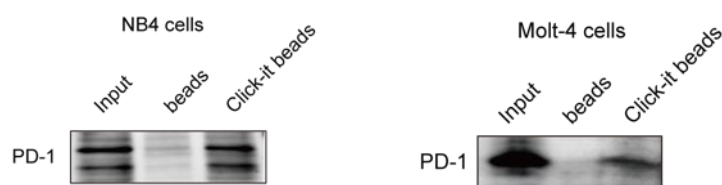

**Fig.S1A.** The Click-IT assay in NB4 (left panel) and Molt-4 cells (**right pane**) showing the same endogenous PD-1 band size in Click-IT beads compared to input lysate.

**B**

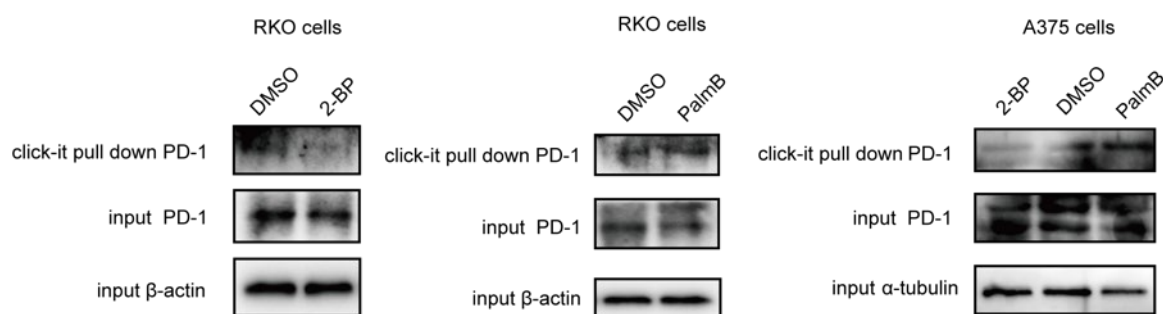

**Fig.S1B.** Click-IT assay of the palmitoylation level of PD-1 in RKO cells treated with 2-BP (left panel) or palmostatinB (middle panel) and in A375 cells treated with 2-BP or palmostatinB (right panel).

**Fig.S2.** Statistics of expression of PD-1 in a panel of cancer cell lines.

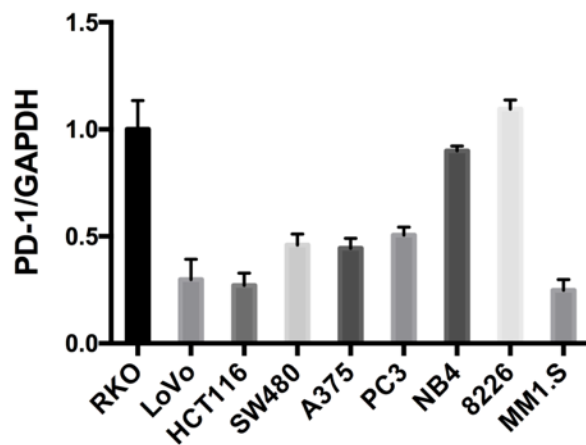

**Fig.S2.** Statistics of expression of PD-1 in a panel of cancer cell lines by western-blot using anti-PD-1 specific antibody from three independent experiments.  $n = 3$  independent experiments.

**Fig.S3** The mRNA expression of different DHHCs in the indicated cancer types, Western Blot results and quantification.

**A**

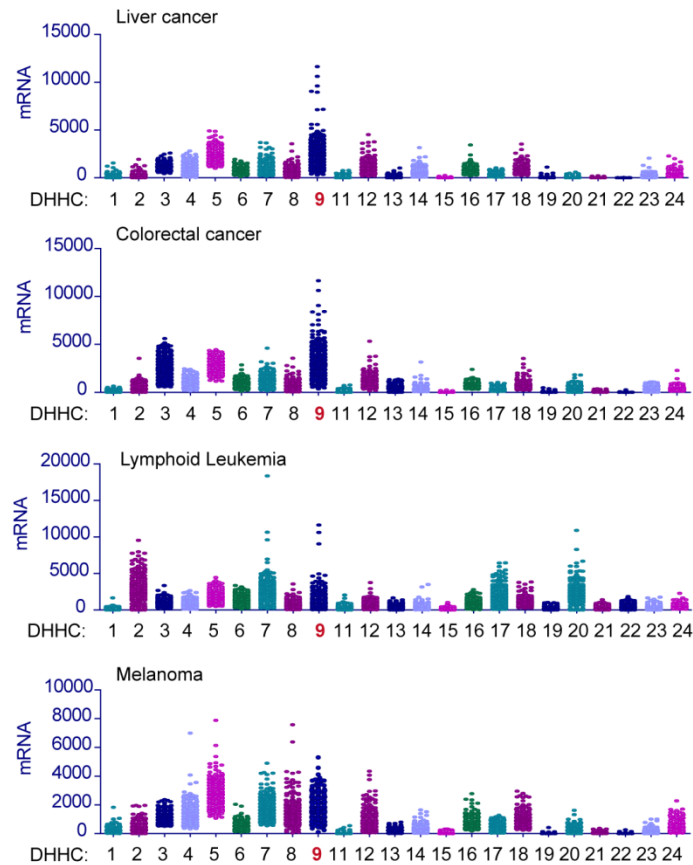

**Fig.S3A.** The mRNA expression of different DHHCs in the indicated cancer types, according to the mRNA expression data set of the CCLE (Cancer Cell Line Encyclopedia) project. The x-axis indicates the identity of DHHC (e.g., '9' indicates DHHC9), and the y-axis shows the mRNA expression level determined by RNA-seq.

**B**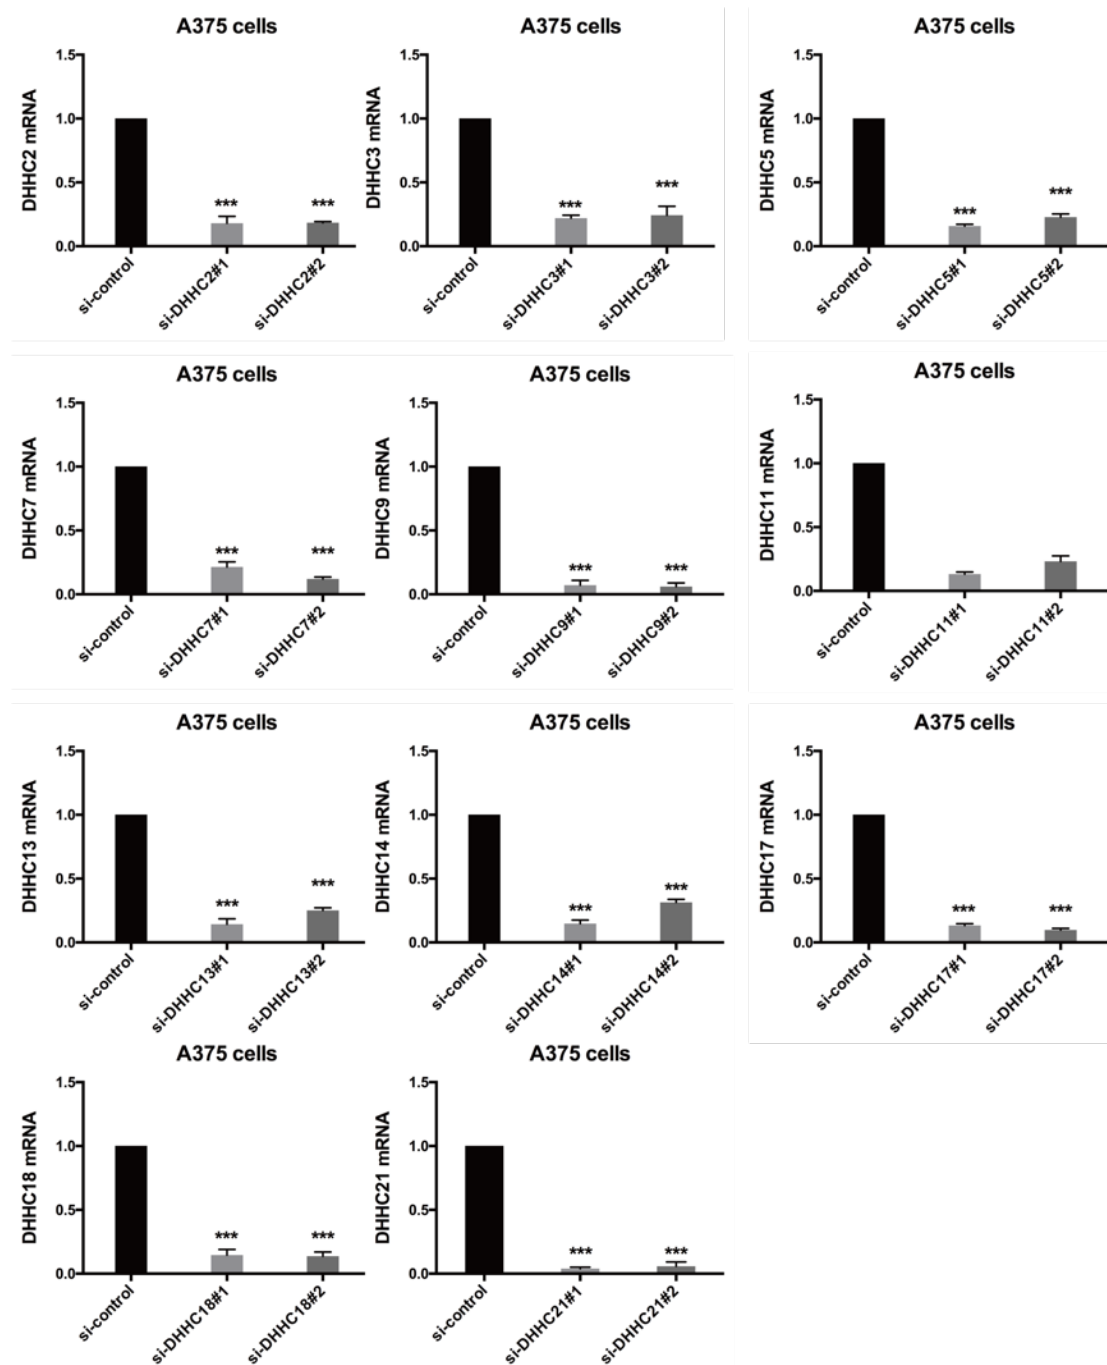

**Fig.S3B.** Real time PCR assay showing the mRNA expression of different DHHCs in A375 cells treated by two independent siRNAs targeting the indicated DHHC enzymes.

\*\*\* P<0.001, ANOVA test. *n* = 3 independent experiments.

C

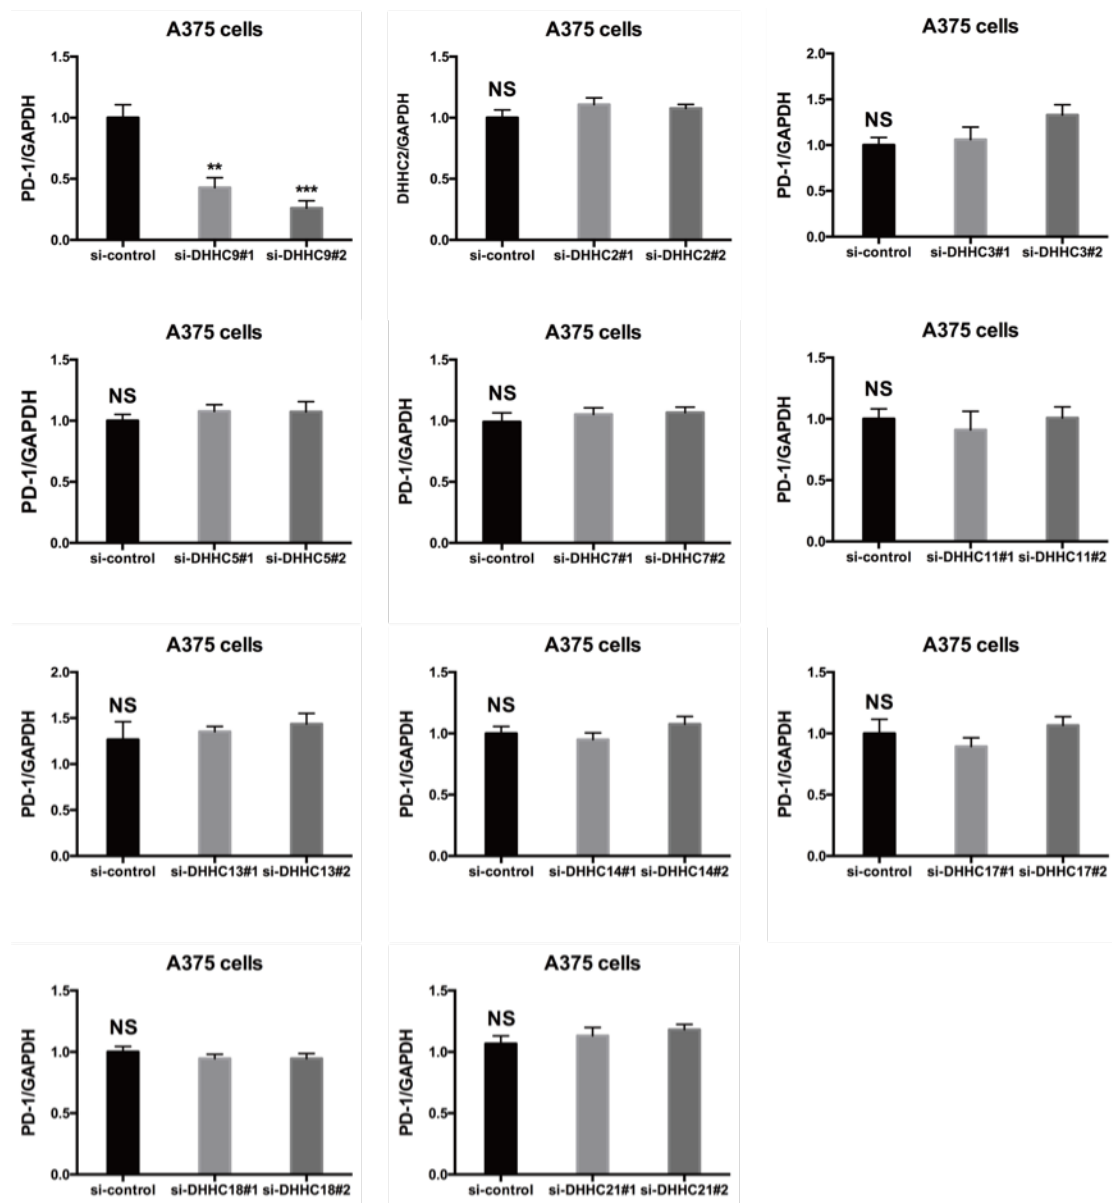

**Fig.S3C.** Statistics of western blot assay for DHHC screening in A375 cells from three independent experiments. \*\*\* P<0.001, \*\* P<0.01, NS, P>0.05, ANOVA test. *n* = 3 independent experiments.

**D**

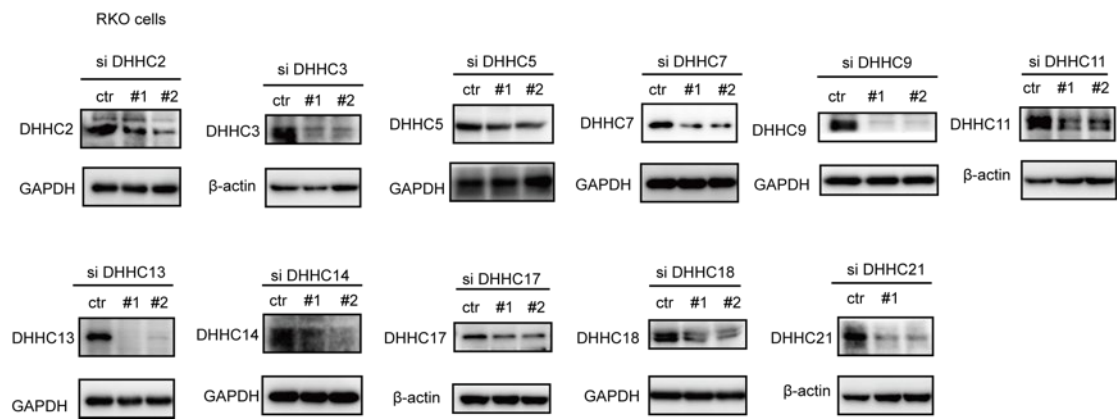

**Fig.S3D.** Western blot showing effect of two independent siRNAs targeting the indicated DHC enzymes on DHC protein levels in RKO cells with the specific antibody for each DHC enzyme.

**E**

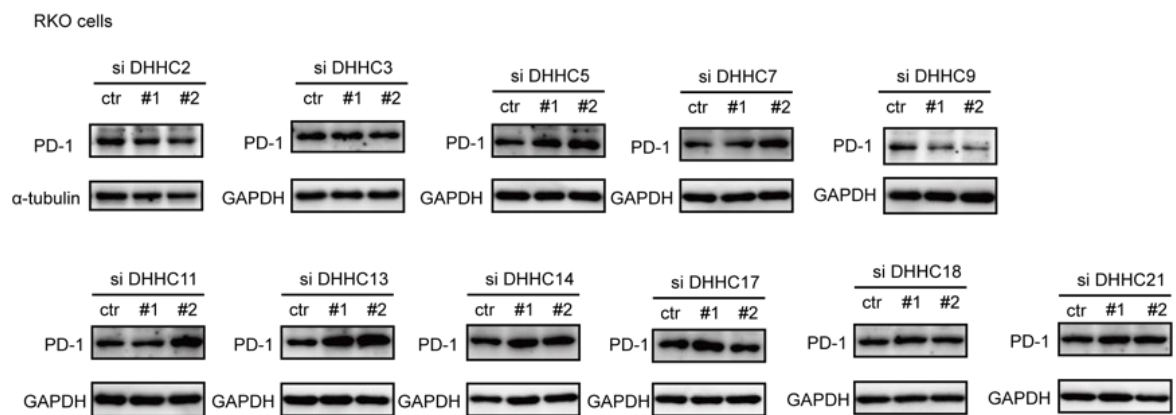

**Fig.S3E.** Western blot showing the expression of PD-1 in RKO cells treated by two independent siRNAs targeting the indicated DHC enzymes.

**F**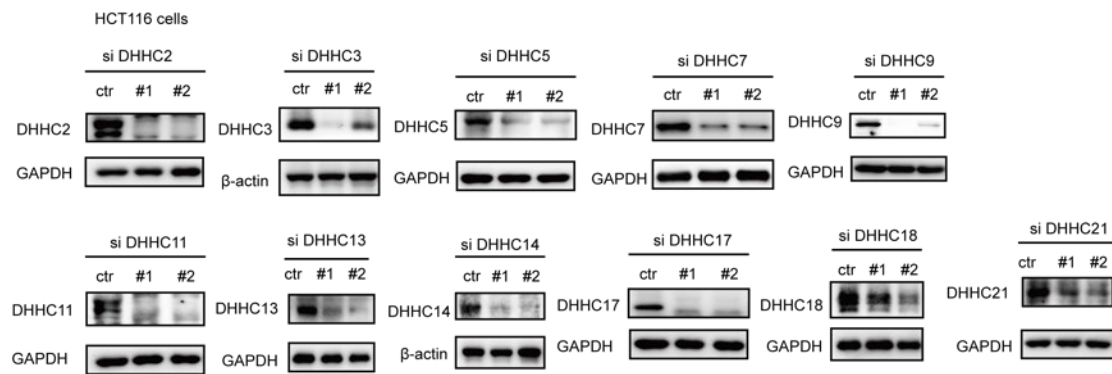

**Fig.S3F.** Western blot showing effect of two independent siRNAs targeting the indicated DHC enzymes on DHC protein levels in HCT116 cells with the specific antibody for each DHC enzyme.

**G**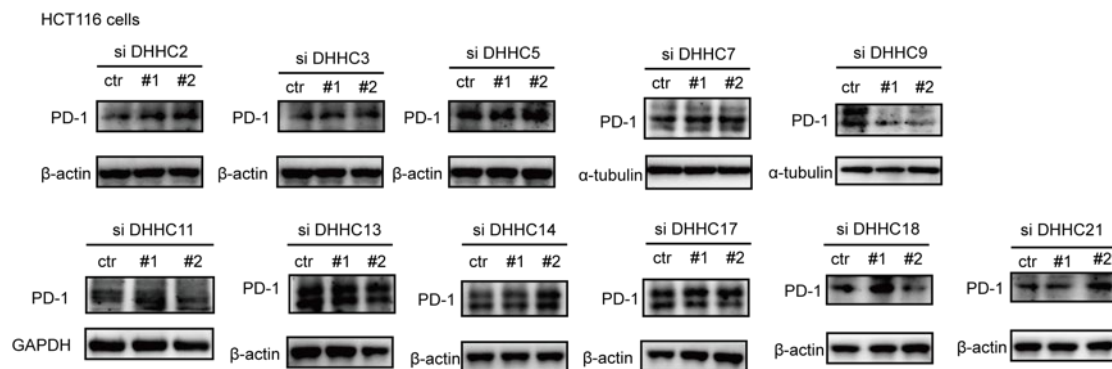

**Fig.S3G.** Western blot showing the expression of PD-1 in HCT116 cells treated by two independent siRNAs targeting the indicated DHC enzymes.

**H**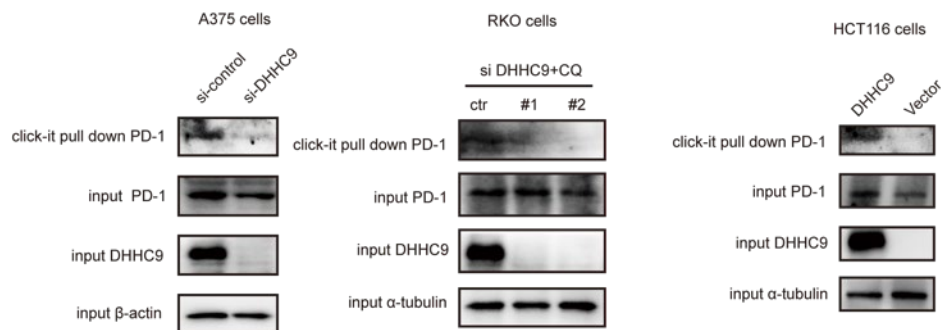

**Fig.S3H.** Click-IT assay of palmitoylation level of PD-1 in A375 cells (left panel) and RKO cells (middle panel) transfected with DHHC9 siRNA and in HCT116 cells transfected with DHHC9 plasmid.

I

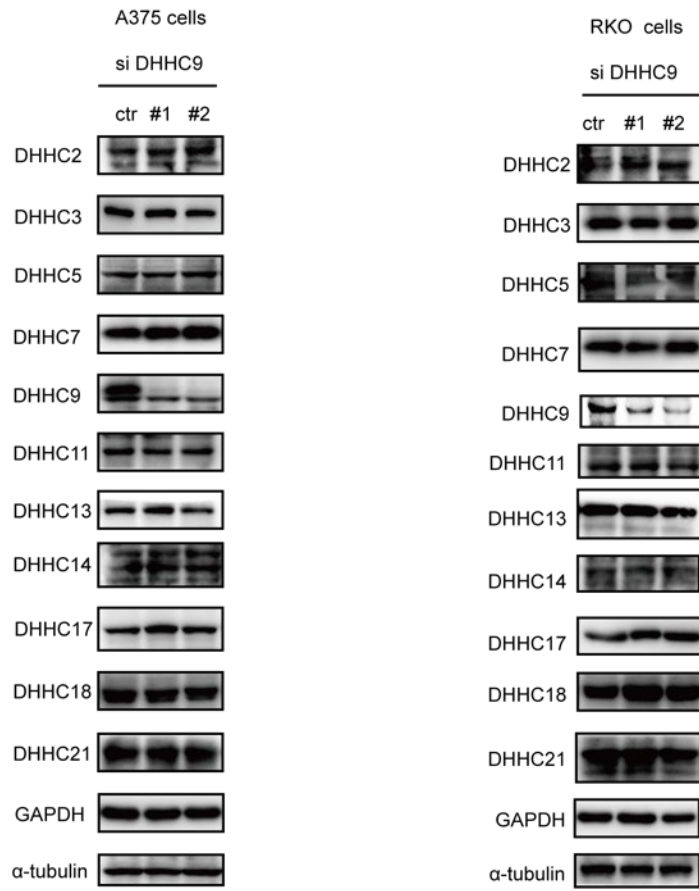

**Fig.S3I.** Western blot showing the expression of different DHC enzymes with transfection of DHC9 siRNA in A375 cells (left panel) and RKO cells(right panel).



**Fig.S4. The degradation of PD-1 evaluated by cycloheximide (CHX)-chase assay**

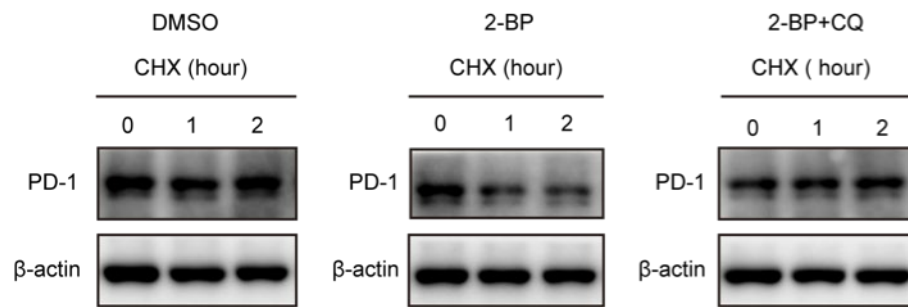

**Fig.S4.** The degradation of PD-1 was evaluated by cycloheximide (CHX)-chase assay. Treatment with 2-BP reduces PD-1 level and this decrease is rescued by the lysosomal inhibitor chloroquine (CQ).

**Fig.S5. Quantification of western blotting assay from three independent experiments**

**A**

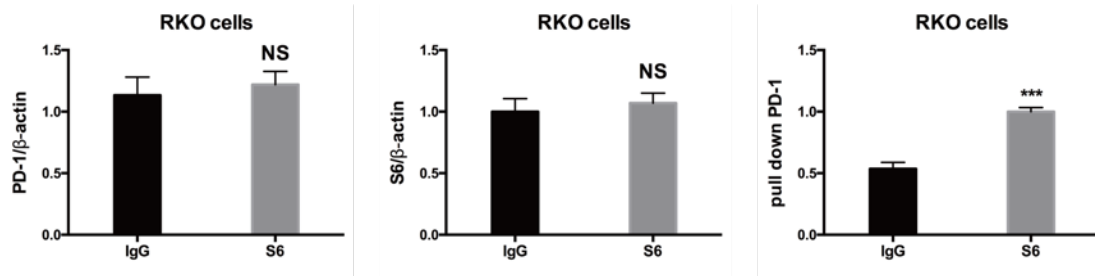

**Fig.S5A. Quantification of western blotting assay from three independent experiments in Figure 5A.**

**B**

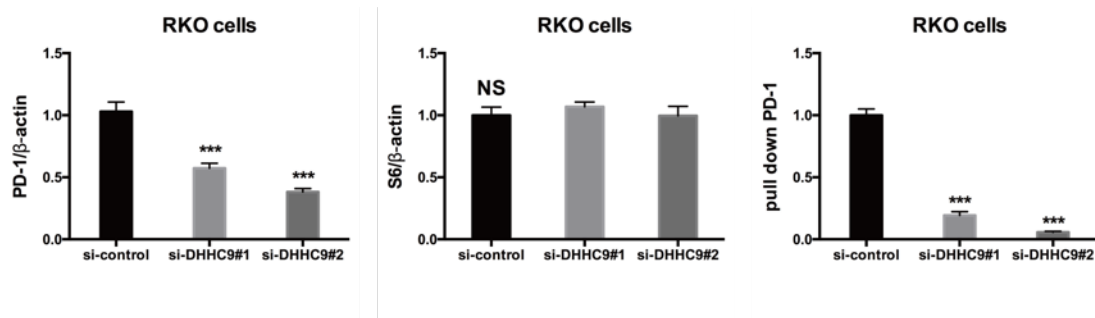

**Fig.S5B. Quantification of western blotting assay from three independent experiments in Figure 5B. \*\*\* P<0.001, NS, P>0.05, ANOVA test. n = 3 independent experiments.**

C

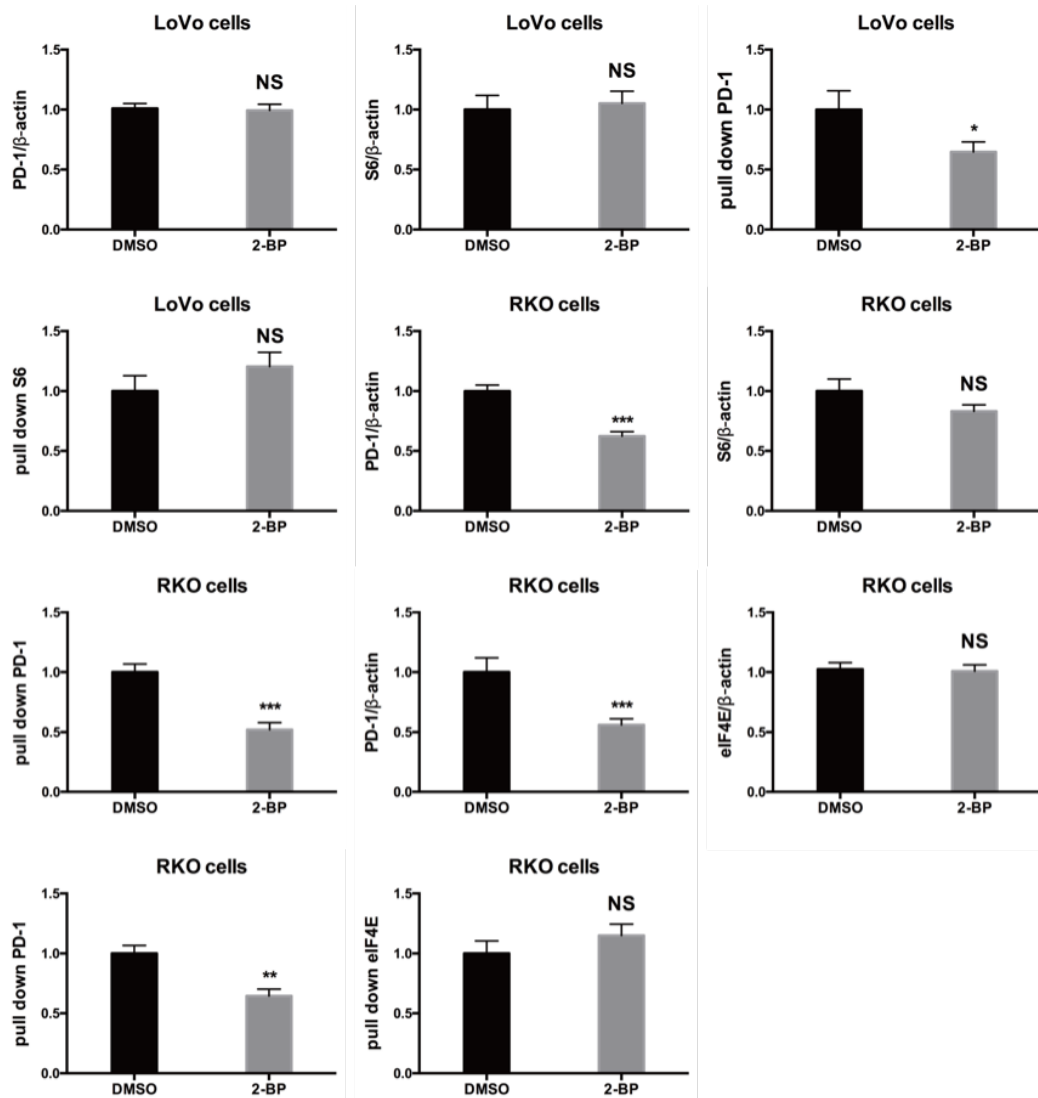

**Fig.S5C.** Quantification of western blotting assay from three independent experiments in Figure 5C. \*\*\*  $P < 0.001$ , \*\*  $P < 0.01$ , \*  $P < 0.05$ , NS,  $P > 0.05$ , ANOVA test.  $n = 3$  independent experiments.

D

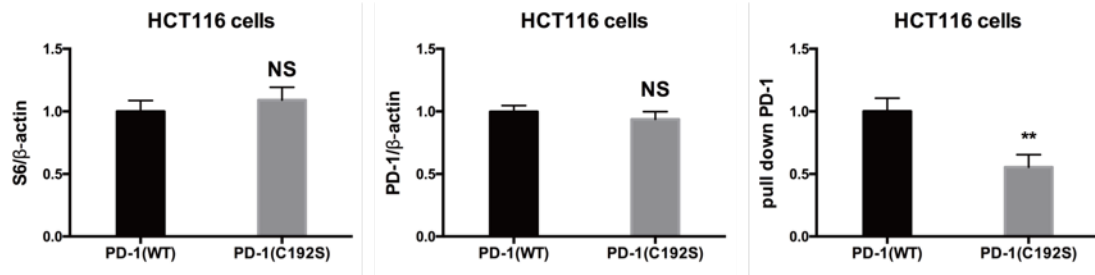

**Fig.S5D.** Quantification of western blotting assay from three independent experiments in Figure 5D. \*\*  $P < 0.01$ , NS,  $P > 0.05$ , ANOVA test.  $n = 3$  independent experiments.

**E**

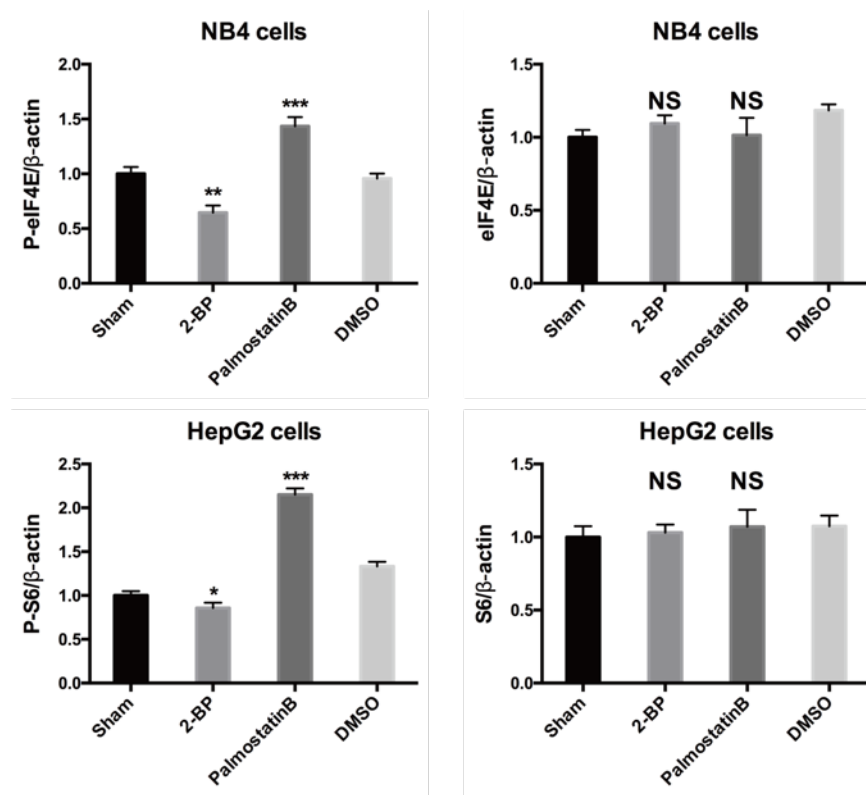

**Fig.S5E.** Quantification of western blotting assay from three independent experiments in Figure 5E. \*\*\*  $P < 0.001$ , \*\*  $P < 0.01$ , \*  $P < 0.05$ , NS,  $P > 0.05$ , ANOVA test.  $n = 3$  independent experiments.

F

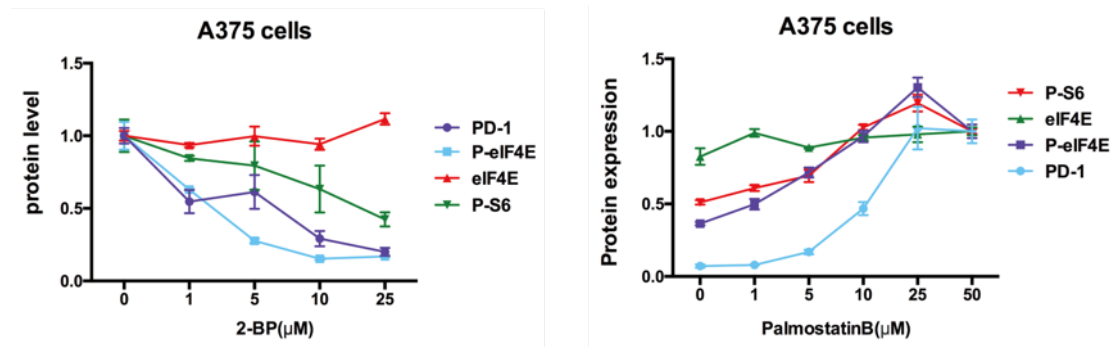

**Fig.S5F.** Quantification of western blotting assay from three independent experiments in Figure 5F.

G

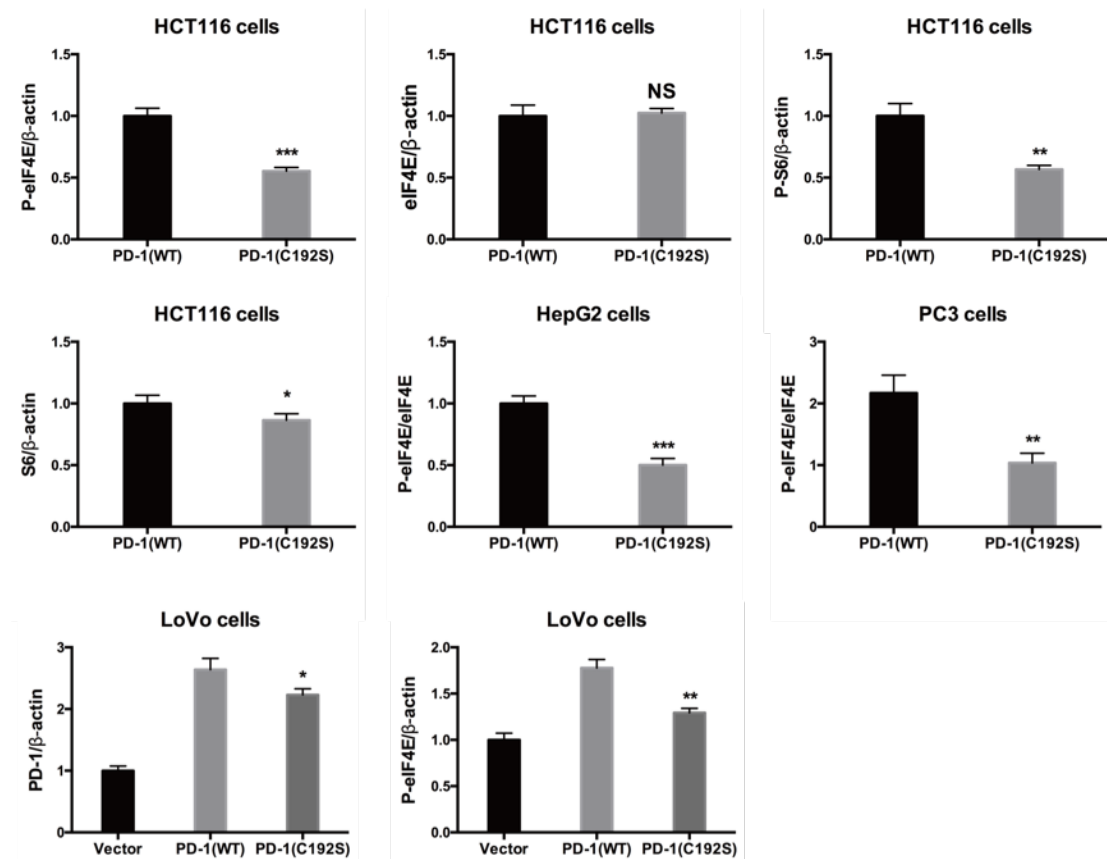

**Fig.S5G.** Quantification of western blotting assay from three independent experiments in Figure 5G. \*\*\*  $P < 0.001$ , \*\*  $P < 0.01$ , \*  $P < 0.05$ , NS,  $P > 0.05$ , ANOVA test.  $n = 3$  independent experiments.

**Fig.S6. Anchorage-free colony formation and Western Blot assays.**

**A**

HCT116 cells

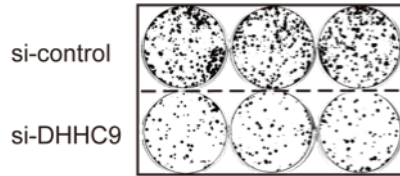

**Fig.S6A.** Silencing DHHC9 decreases anchorage-free colony formation compared to control conditions.

**B**

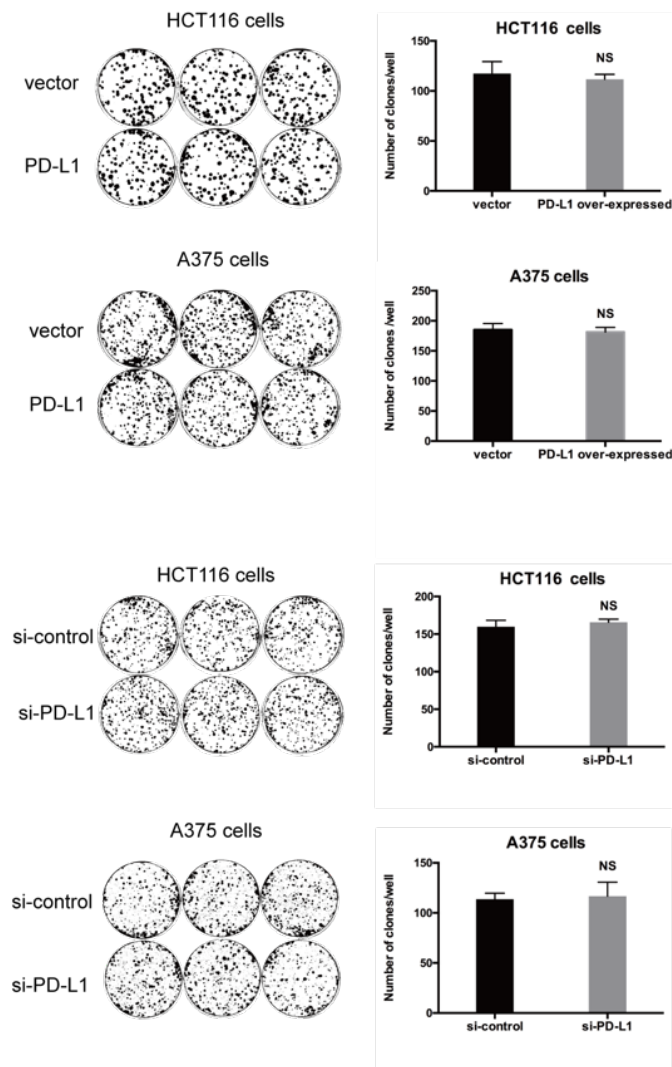

**Fig.S6B.** Clone formation assay showing that overexpressing or silencing PD-L1 does not affect tumor cell growth. NS,  $P > 0.05$ , ANOVA test.  $n = 3$  independent experiments.

**C**

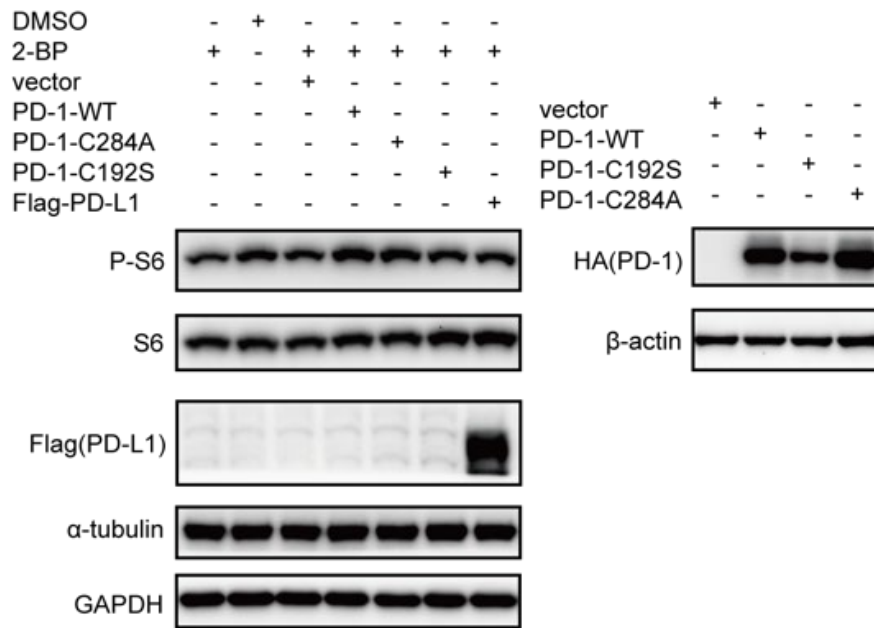

**Fig.S6C.** Western blot assay showing that PD-1 and its C284A mutant but not its C192S mutant or PD-L1 can rescue the effect of 2-BP on reducing phosphorylation level of S6.

**Fig.S7. Western bolt assay showing the effect of PD1-PALM.**

**A**

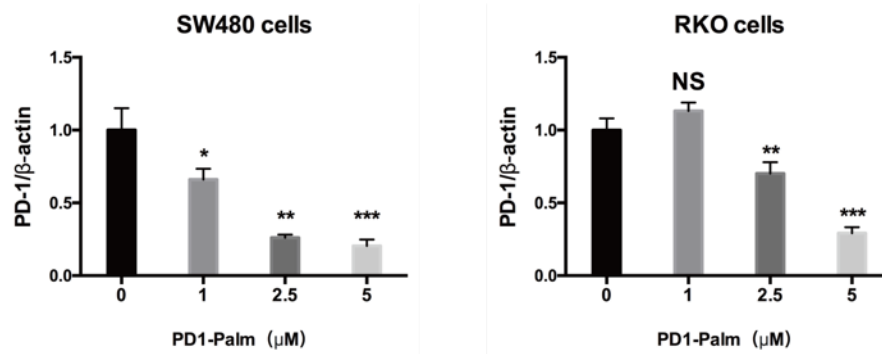

**Fig.S7A.** Quantification of the western blotting assay in Figure 7C from three independent experiments. \*\*\* P<0.001, \*\* P<0.01, \* P<0.05, NS, P>0.05, ANOVA test. *n* = 3 independent experiments.



**B**

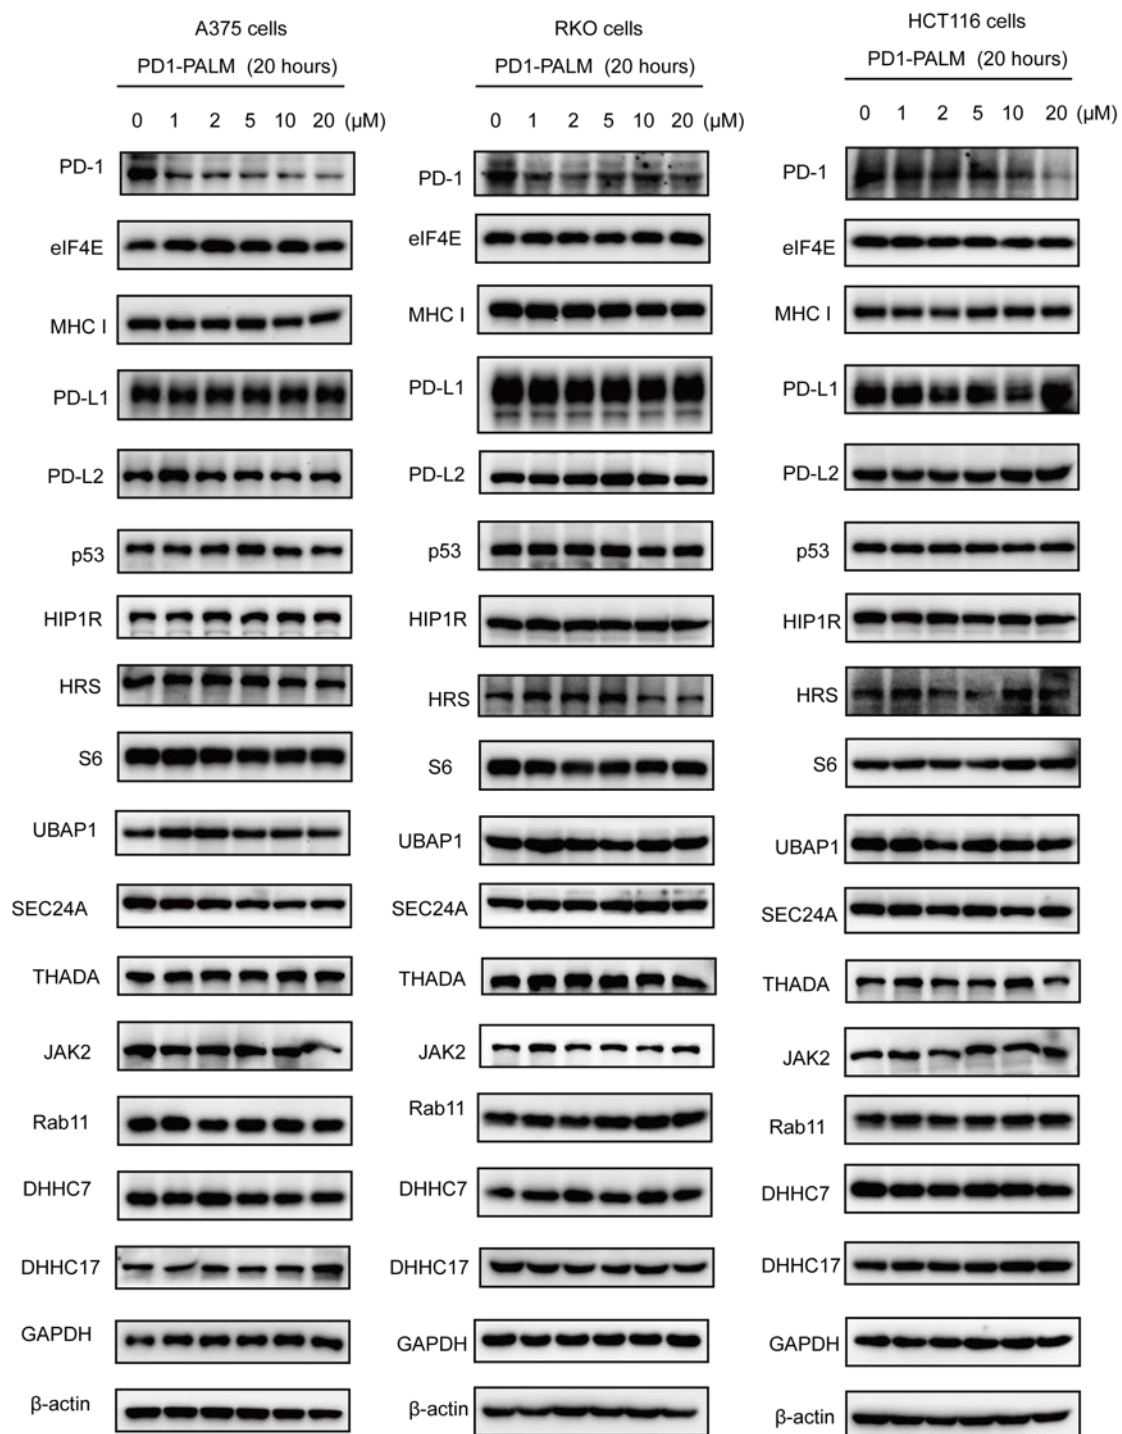

**Fig.S7B.** Western bolt assay showing the effect of PD1-PALM on the expression of other seventeen proteins besides PD-1.

## Supplementary Tables.

**Table S1.** Sequences of siRNAs used in this study.

| Name                | Sense                     | Antisense                 |
|---------------------|---------------------------|---------------------------|
| si-DHHC3#1          | CCACAGUGAUUCUCCUUAUTT     | AUAAGGAGAAUCACUGUGGTT     |
| si-DHHC3#2          | CCUCAAGUGGAUUCACUUTT      | AAGUGAAUCCACUUUGAGGTT     |
| si-DHHC5#1          | CCAGACUCAGUGGACAUUUTT     | AAAUGUCCACUGAGUCUGGTT     |
| si-DHHC5#2          | GGCUCAUUGGCAUUUAGUUTT     | AACUAAAUGCCAAUGAGCCTT     |
| si-DHHC5#3          | GCUCAUUGGCAUUUAGUUUTT     | AAACUAAAUGCCAAUGAGCCTT    |
| si-DHHC2#1          | AAGGAUCUCCCAUCUAUUTT      | AAUAGAUGGGAAGAUCUUGG      |
| si-DHHC2#2          | GGAUCUCCCAUCUAUACCTT      | GGUAUAGAUGGGAAGAUCCCTT    |
| si-DHHC7#1          | CCGGGACGUCGAGCAUCAUTT     | AUGAUGCUCGACGUCCCGGTT     |
| si-DHHC7#2          | GCAGACUUCGUGGUGACUUTT     | AAGUCACCACGAAGUCUGCTT     |
| si-DHHC7#3          | GCGCCCACCACUGCAGUAUTT     | AUACUGCAGUGGUGGGCGCTT.    |
| si-DHHC9#1          | GGGACUGACUGGAUUUCAUTT     | AUGAAAUCCAGUCAGUCCCTT     |
| si-DHHC9#2          | GGAAGAAUCGCGUCCAGAATT     | UUCUGGACGCGAUUCUUCCTT     |
| si-DHHC9#3          | CCAGAAUCCCUACAGCCAUTT     | AUGGUCGUAGGGAUUCUGGTT     |
| si-DHHC11#1         | GCAGGUGCAGACCCUGAUATT     | UAUCAGGGUCUGCACCUGCTT     |
| si-DHHC11#2         | GCAGUGAGGAAAGAUCCAUTT     | AUGGAUCUUUCCUCACUGCTT     |
| si-DHHC11#3         | GCAGGCGCCUGUGUCAGUUTT     | AACUGACACAGGCGCCUGCTT     |
| siDHHC14#1          | CAAGCCUGAUCGACAGAAGAGGGUA | UACCCUCUUCUGUCGAUCAGGCUUG |
| siDHHC14#2          | GACCAGUGCAUUCAGAGCACCAAAU | AUUUGGUGCUCUGAAUGCACUGGUC |
| si-DHHC13#1         | GCAUCCACCUGGCAGUAUUTT     | AAUACUGCCAGGUGGAUGCTT     |
| si-DHHC13#2         | GGUUGGGUAUAAGAACCUUTT     | AAGGUUCUUAUACCCAACCTT     |
| si-DHHC13#3         | GGACAUCACAGUACACCAUTT     | AUGGUGUACUGUGAUGUCCTT     |
| si-DHHC17#1         | GGAUGUAGAUUAUGAUGGAUTT    | AUCCAUCAUAUCUACAUCCTT;    |
| si-DHHC17#2         | GCAGCAUAUAGAACACAUATT     | UAUGUGUUCUAUAUGCUGCTT     |
| si-DHHC17#3         | GCUACAGUACAGUUUCUUUTT     | AAAGAAACUGUACUGUAGCTT     |
| si-DHHC18#1         | CCGGCCUCUUCUUCGUCUUT      | AAGACGAAGAAGAGGCCGGTT     |
| si-DHHC18#2         | GCGCUCAGGGAAGCAACUUTT     | AAGUUGCUUCCUGAGCGCTT      |
| si-DHHC18#3         | CCAAGCCUGAUGCCAGCAUTT     | AUGCUGGCAUCAGGCUUGGTT     |
| si-DHHC21#1         | GCGUAAUUUGACCUCUUUTT      | AAAGAGGUCCAAAUAACGCTT     |
| si-DHHC21#2         | GCAGCCUUUAUGGGCAUUATT     | UAAUGCCCAUAAAAGGCUGCTT    |
| si-DHHC21#3         | CCAUCUUAGGCAUCAUAATT      | UUAUGAUGCCUAAGAUUGGTT.    |
| si-Negative control | UUCUCCGAACGUGUCACGUTT     | ACGUGACACGUUCGGAGAATT     |
